# Supplementary material
Source: Springer Nature journal article supplement (https://www.springermedizin.de/resource/supplementary/13256_2009_1048_MOESM4_ESM.pdf/9647702)

**CT findings of a superior mesenteric artery dissection (no extravasation of contrast medium, no mesenteric hematoma)**

**Asymptomatic  
(incidental finding)  
No CT sign of intestinal  
ischemia**

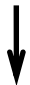

**Anticoagulation and  
close follow up (CT)**

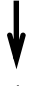

**Asymptomatic  
progressive dissection  
or thrombosis of the  
true lumen**

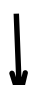

**Stent  
Local fibrinolysis**

**Symptomatic  
progression**

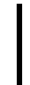

**Acute ongoing  
pain**

**Acute transient pain /  
chronic relapsing pain  
No CT sign of intestinal  
ischemia**

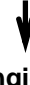

**Consider angiography and  
stent**

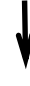

**Success**

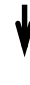

**Follow up  
(CT)**

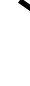

**Failure**

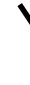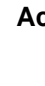

**Laparotomy and  
revascularisation**

**Acute ongoing pain  
with or without sign of  
intestinal ischemia**

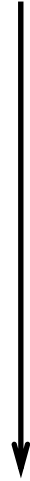

Supplement: MOESM4 [file 9647702]
